# Supplementary material for: Palmitate Induces mRNA Translation and Increases ER Protein Load in Islet β-Cells via Activation of the Mammalian Target of Rapamycin Pathway
Source: Oxford University Press journal article supplement (doi:10.2337/db14-0105), 2014-05-17

## SUPPLEMENTARY DATA

**Supplementary Figure 1.** Effect of palmitate on protein synthesis in rodent  $\beta$  cells and on mTOR signaling in human islets. *A*, 35S-Met/Cys incorporation (*left panel*) into MIN6 cells upon incubation with cycloheximide (CHX, 50  $\mu$ g/ml), palmitate (PAL, 0.5 mM), or control (CTL) cells. CHX and PAL were added for 1 h, and 35S-Met/Cys was added during the final 15 min. *Right panel* is the corresponding quantitation of 35S proteins ( $N=3$  experiments); *B*, Identical to *panel A*, except that cells were primary mouse islets; *C*, Human islets (from 3 donors) were incubated with under control (CTL) or palmitate (PAL, 0.5 mM) conditions in the presence of 11 mM glucose for 1 h, then extracts were subjected to immunoblotting for the indicated proteins. *Upper panels* show representative immunoblots, and *lower panels* show corresponding quantitations ( $N=3$ ). \* $P<0.05$  for the value compared to control.

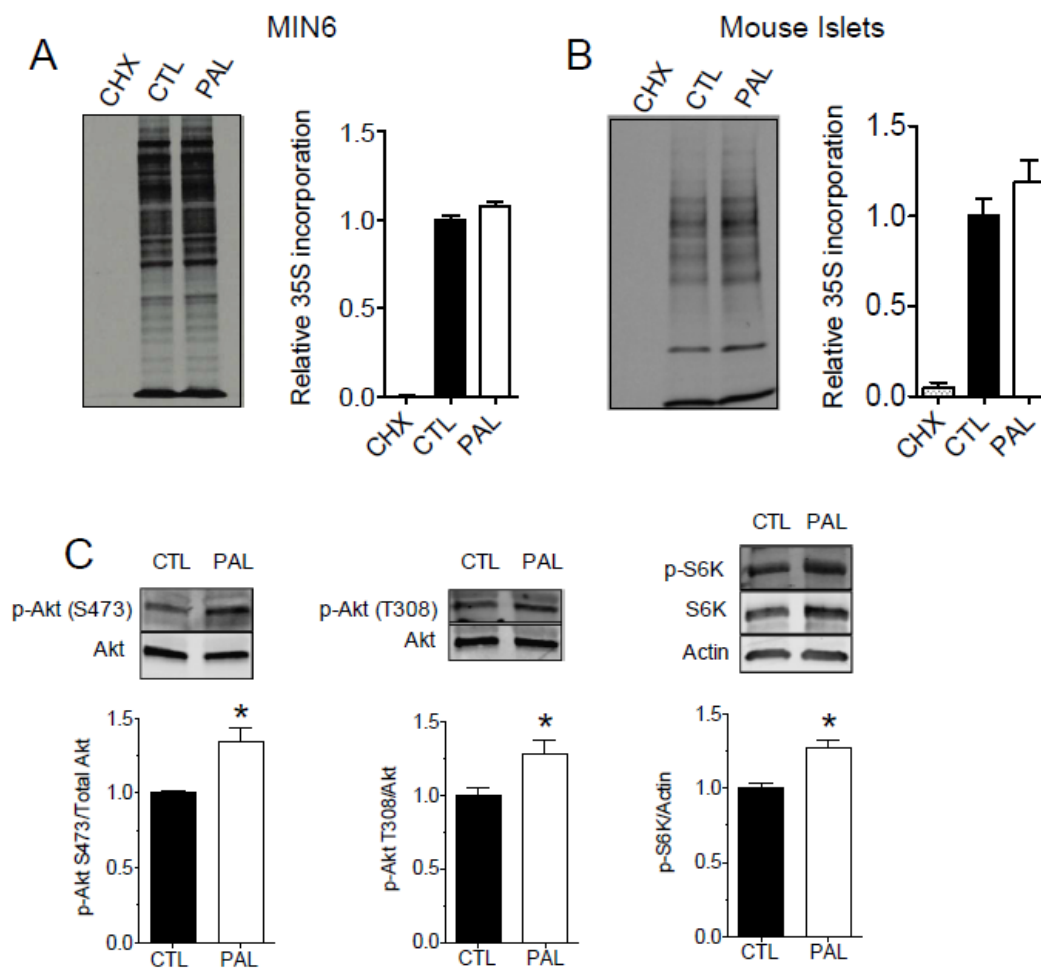

## SUPPLEMENTARY DATA

**Supplemental Figure 2.** Effect of BSA and glucose concentrations on palmitate-induced mTOR activation in MIN6 cells. *A*, MIN6 cells were incubated under control (*CTL*) and palmitate (*PAL*, 0.5 mM) conditions for 1 h using a palmitate:BSA molar ratio of 5:1, then subjected to immunoblotting for the proteins indicated. *Upper panels* show representative immunoblots, and *lower panels* show corresponding quantitations ( $N=3$ ); *B*, PRP of MIN6 cells after incubation under control and palmitate (0.5 mM) conditions for 1 h using a palmitate:BSA molar ratio of 5:1 and corresponding quantitation of the P/M ratio (*right panel*); *C*, PRP of MIN6 cells after incubation under control and palmitate (0.5 mM) conditions for 1 h using a palmitate:BSA molar ratio of 2.5:1 (*left panel*) and corresponding quantitation of the P/M ratio (*right panel*); *D*, MIN6 cells were incubated under control and palmitate (0.5 mM) conditions for 1 h in 3 mM glucose (palmitate:BSA ratio of 8:1), then subjected to immunoblotting for the proteins indicated. *Upper panels* show representative immunoblots, and *lower panels* show corresponding quantitations ( $N=3$ ); *E*, PRP of MIN6 cells after incubation under control and palmitate (0.5 mM) conditions for 1 h in 3 mM glucose (palmitate:BSA ratio of 8:1). \* $P<0.05$  for the value compared to control.

# SUPPLEMENTARY DATA

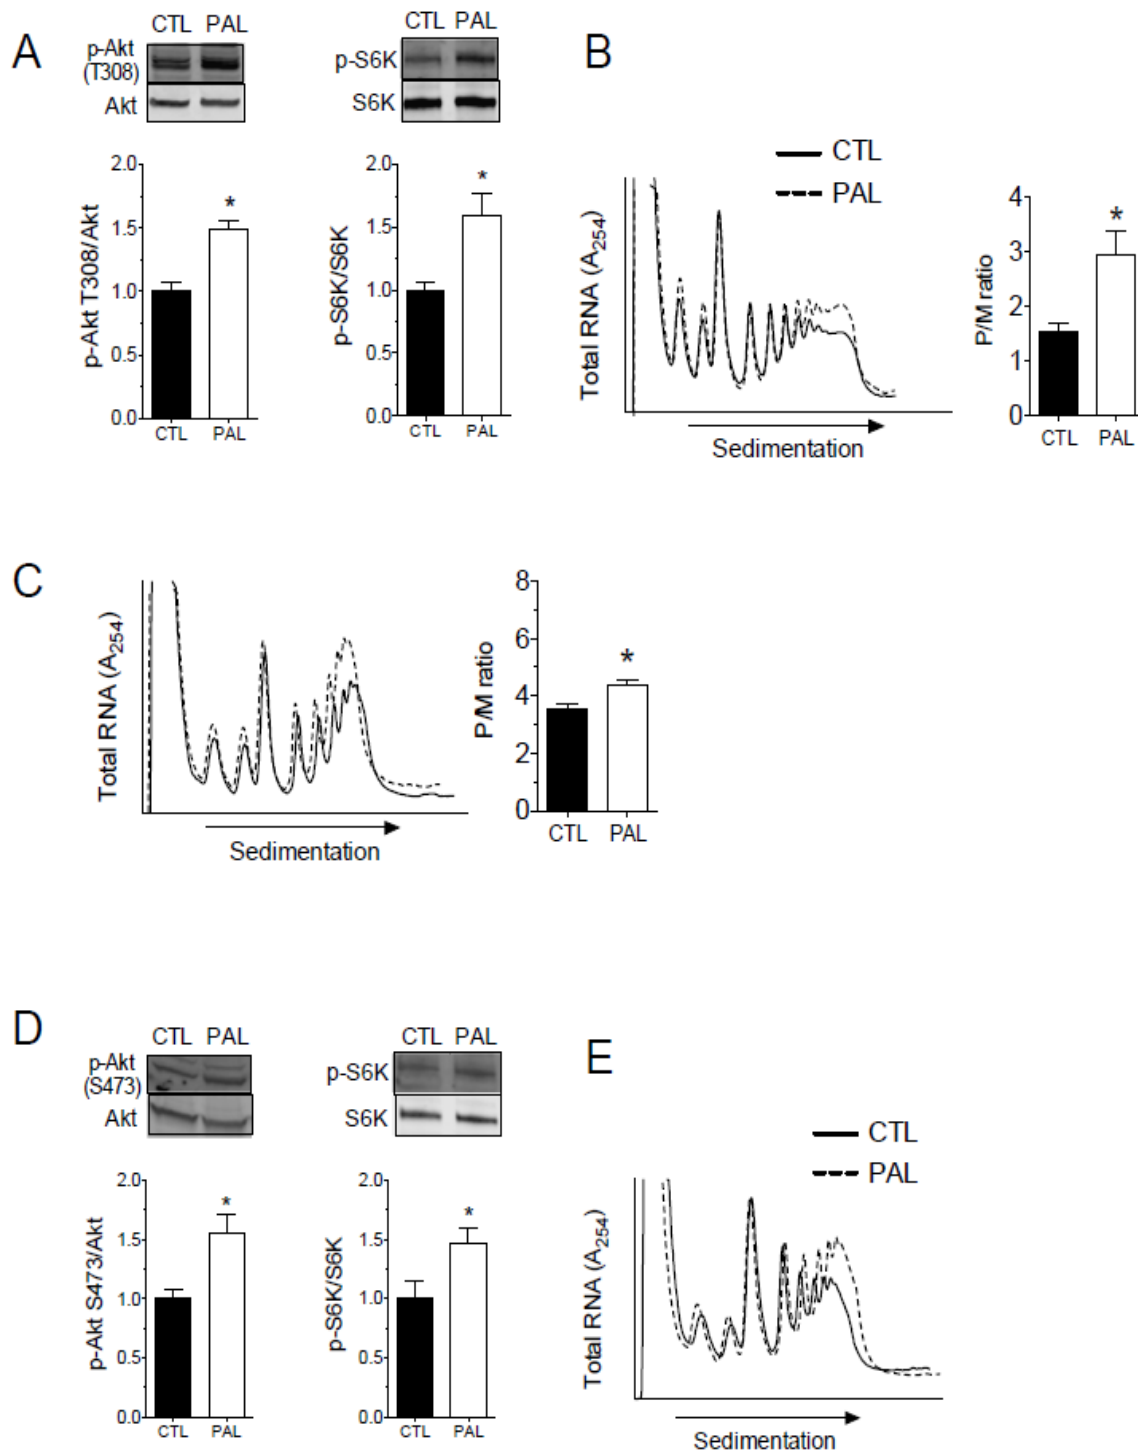

Supplement: db140105supplementarydata.pdf [file db140105supplementarydata.pdf]
